# Supplementary material
Source: PubMed Central journal article supplement (PMC4285712)
Supplement: NIHMS646309-supplement-zimmerman.pdf [file NIHMS646309-supplement-zimmerman.pdf]

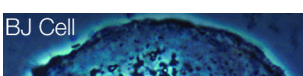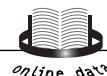**SUPPLEMENTARY ONLINE DATA****Sorting nexin 27 (SNX27) associates with zonula occludens-2 (ZO-2) and modulates the epithelial tight junction**Seth P. ZIMMERMAN\*, Christina L. HUESCHEN\*, Daniela MALIDE†, Sharon L. MILGRAM\* and Martin P. PLAYFORD\*<sup>1</sup>

\*Cell Biology and Physiology Center, National Institutes of Health, Bethesda, MD 20982, U.S.A., and †NHLBI Light Microscopy Core, National Heart, Lung, and Blood Institute, National Institutes of Health, Bethesda, MD 20982, U.S.A.

Supplementary Figures S1–S4 can be found on the following pages.

<sup>1</sup> To whom correspondence should be addressed (email [playfordmp@nhlbi.nih.gov](mailto:playfordmp@nhlbi.nih.gov)).

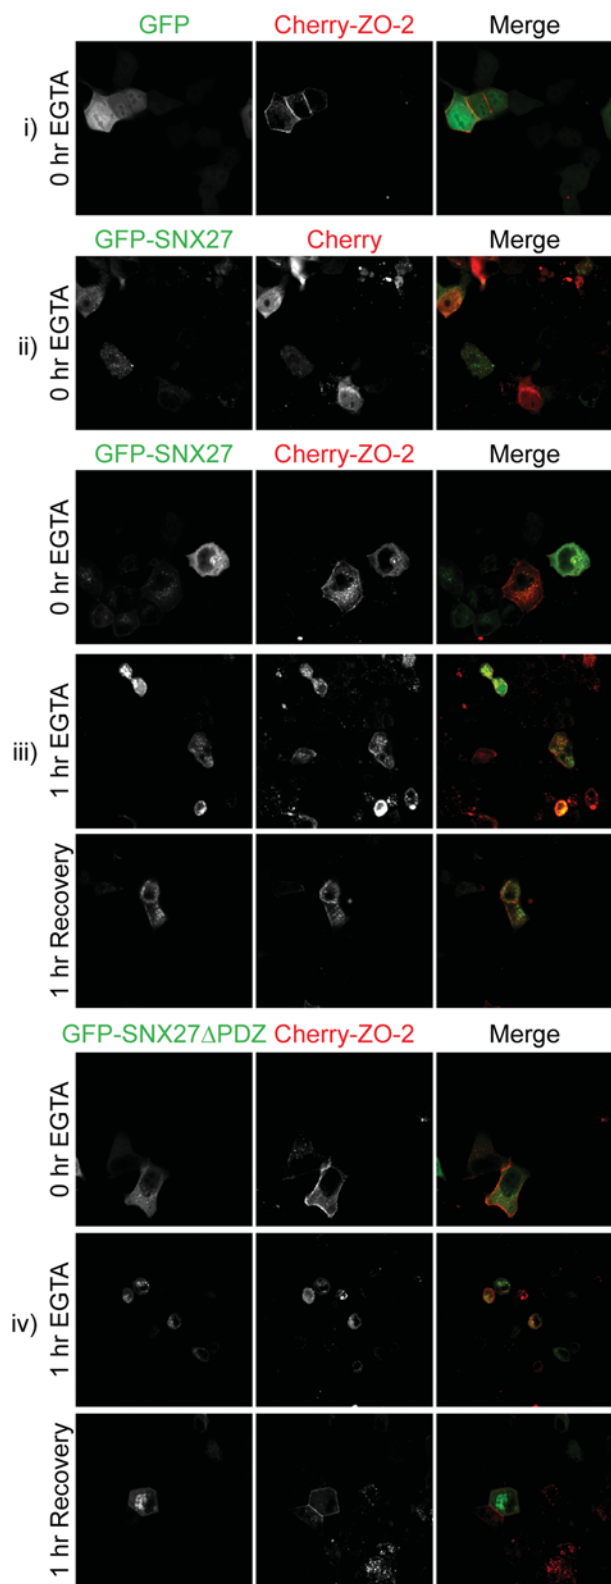

**Figure S1** Additional images for Figure 4 of the main text of mpkCCD cells transiently transfected with the indicated GFP and mCherry constructs

The cells were grown to confluence and subjected to the calcium-switch procedure for the indicated times. Cells were fixed and visualized with confocal microscopy.

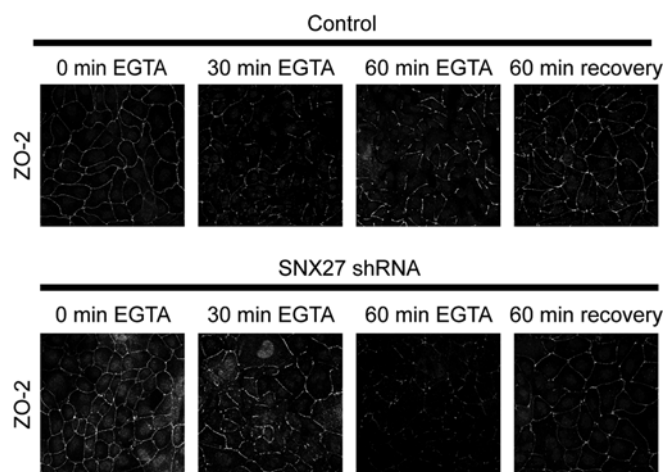

**Figure S2** SNX27 knockdown does not alter ZO-2 localization during calcium switch

Control or SNX27-knockdown cells were subjected to calcium switch and fixed at specified time points. Cells were stained using a polyclonal antibody against ZO-2 and visualized by confocal microscopy.

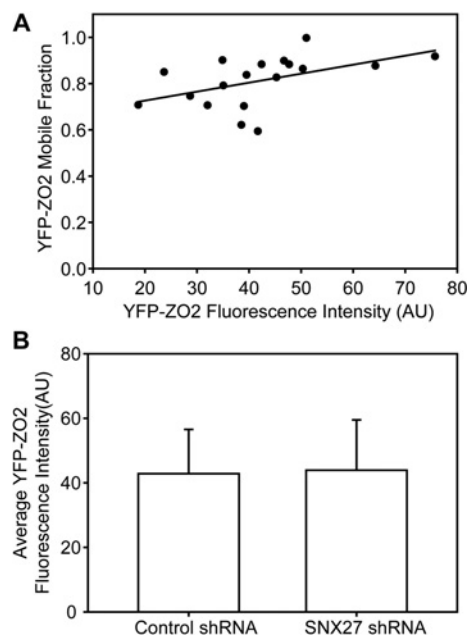

**Figure S3** YFP-ZO-2 expression levels does not significantly alter the mobile fraction

(A) Average fluorescence intensity of YFP-ZO-2 compared with the mobile fraction (linear regression analysis,  $R = 0.53$  and slope = 0.0048). (B) Average initial YFP-ZO-2 fluorescence intensity of control and SNX27-knockdown mpkCCD cells analysed by FRAP (error bars represent the S.D.).

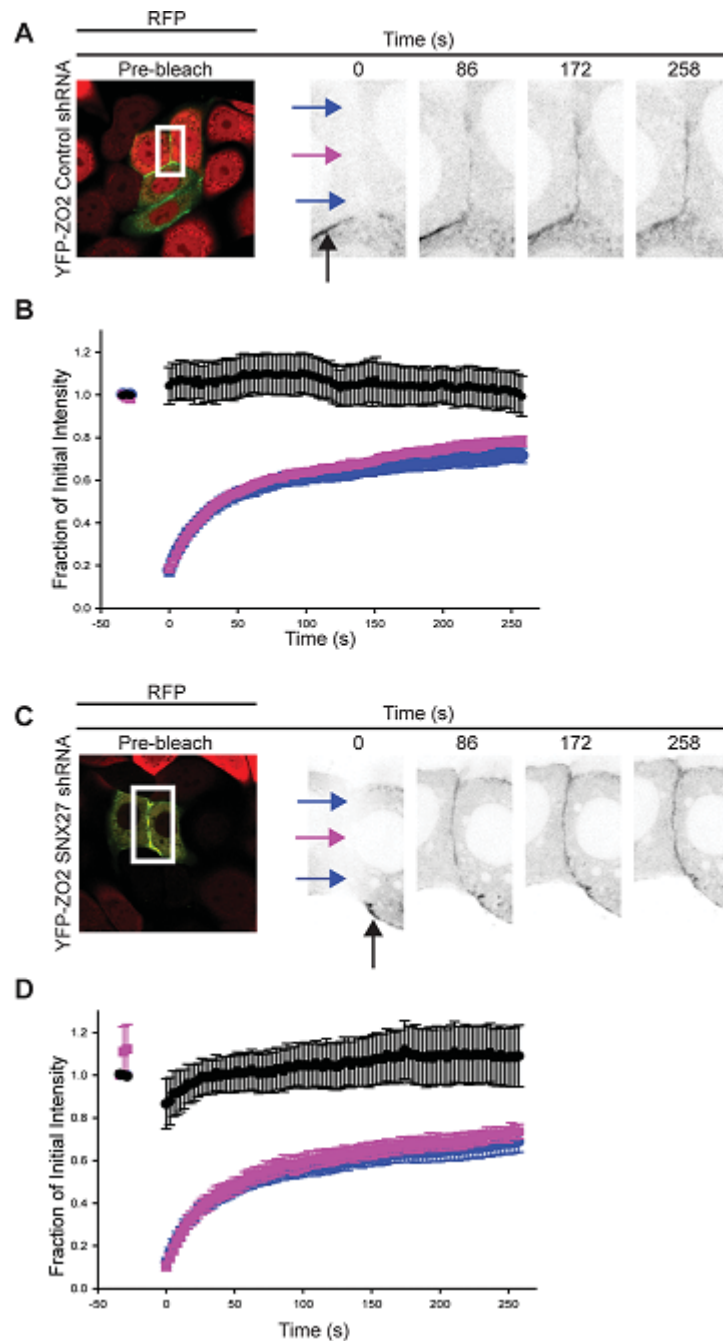

**Figure S4 Perturbation of ZO-2 kinetics in SNX27-knockdown cells is due to hindrance of cytoplasmic/TJ exchange**

Control or SNX27-knockdown cell monolayers were transiently transfected with YFP-ZO-2 (**A** and **C**). Points of cell-cell contact in both YFP- and RFP-expressing cells were photobleached and the rate of fluorescence recovery of ZO-2 at the TJ for the indicated times and regions of interest (arrows) was monitored by YFP and quantified (**B** and **D**). The colour of lines in (**B**) and (**C**) represent the co-ordinated region of interest monitored in (**A**) and (**C**). Cells expressing shRNA and YFP-ZO-2 were identified through RFP and YFP fluorescence. High magnification images of TJ sections at the indicated times are shown (error bars represent the S.D.).
